# Supplementary material for: A copper-mediated Fenton-like dual-mode optical sensor for sensitive determination of acetylcholinesterase activity in biological fluids
Source: Royal Society of Chemistry journal article supplement (doi:10.1039/d6ra01851c), 2026-04-21
Supplement: d6ra01851c1.pdf [file d6ra01851c1.pdf]

## **A Copper-Mediated Fenton-Like Dual-Mode Optical Sensor for Sensitive Determination of Acetylcholinesterase Activity in Biological Fluids**

**Glowi Alasiri<sup>a</sup>, Ali M. Alaseem<sup>b</sup>, Razan Orfali<sup>b</sup>, Mohamed M. El-Wekil<sup>c</sup>, Ramadan Ali<sup>d</sup>,  
Sally A El Moumen Zohny<sup>e</sup>, Yasser M. Omar<sup>f</sup>, Al-Montaser Bellah H. Ali<sup>e\*</sup>**

<sup>a</sup> Department of Biochemistry, College of Medicine, Imam Mohammad Ibn Saud Islamic University (IMSIU), Riyadh 13317, Saudi Arabia.

<sup>b</sup> Department of Pharmacology, College of Medicine, Imam Mohammad Ibn Saud Islamic University (IMSIU), Riyadh 13317, Saudi Arabia

<sup>c</sup> Department of Pharmaceutical Analytical Chemistry, Faculty of Pharmacy, Assiut University, Assiut, Egypt.

<sup>d</sup> Department of Pharmaceutical Chemistry, Faculty of Pharmacy, University of Tabuk, Tabuk 71491, Saudi Arabia

<sup>e</sup> Department of Pharmaceutical Chemistry, Faculty of Pharmacy, Sphinx University, Assiut 71515, Egypt

<sup>f</sup> Institute of Cancer Therapeutics, University of Bradford, BD7 1DP, UK.

\*e-mail: [almontaser\\_bellah@aun.edu.eg](mailto:almontaser_bellah@aun.edu.eg)

## 2.2. Instrumentation

The optical characterization of the synthesized carbon dots was probed through fluorescence and UV-Vis spectroscopic methods, wherein the fluorescence emission spectra were acquired on a Shimadzu RF-5301PC spectrofluorometer by exciting the samples at 310 nm with 5 nm slit widths, while the absorption spectra were generated using a Shimadzu 1601 PC UV-Vis spectrophotometer. The structural and morphological aspects were elucidated by transmission electron microscopy using a JEOL 2100F instrument operating at 200 kV accelerating voltage to visualize the size and shape of the carbon dots, X-ray diffraction patterns recorded with a Philips PW 1700 diffractometer, and Fourier transform infrared spectroscopy performed on KBr pellets using a Nicolet 6700 spectrometer. Furthermore, the surface chemical composition and bonding states were evaluated through X-ray photoelectron spectroscopy utilizing an ESCALAB250 spectrometer from Thermo Scientific.

## 2.4. Quantum yield determination of N, S-CDs

The quantum yield (QY) of N, S-CDs in phosphate buffer was calculated according to the following equation using quinine sulfate (QS) as a reference in 0.1 M H<sub>2</sub>SO<sub>4</sub> (QY = 54 %). By measuring the absorbance (less than 0.05) and emission spectra of a certain concentration of N, S-CDs and quinine sulfate at the excitation wavelength at 360 nm, the absorbance and fluorescence integral area were substituted into the following formula:

$$\phi_{N,S-CDs} = \phi_{QS} \times \frac{F_{N,S-CDs}}{F_{QS}} \times \frac{A_{QS}}{A_{N,S-CDs}} \times \frac{\eta_{N,S-CDs}}{\eta_{QS}}$$

$\Phi_{N,S-CDs}$  represents the quantum yield of N, S-CDs,  $\phi_{QS}$  represents the quantum yield of QS,  $F_{N,S-CDs}$  is the fluorescence intensity of N, S-CDs,  $F_{QS}$  is the fluorescence intensity of quinine sulphate,

A refers to the absorbance value and  $\eta$  refers to the refractive index of the solvent (double distilled water). The synthesized N, S-CDs were dissolved in distilled water ( $\eta = 1.33$ ) and quinine sulfate was dissolved in 0.1 M  $\text{H}_2\text{SO}_4$  ( $\eta = 1.33$ ).

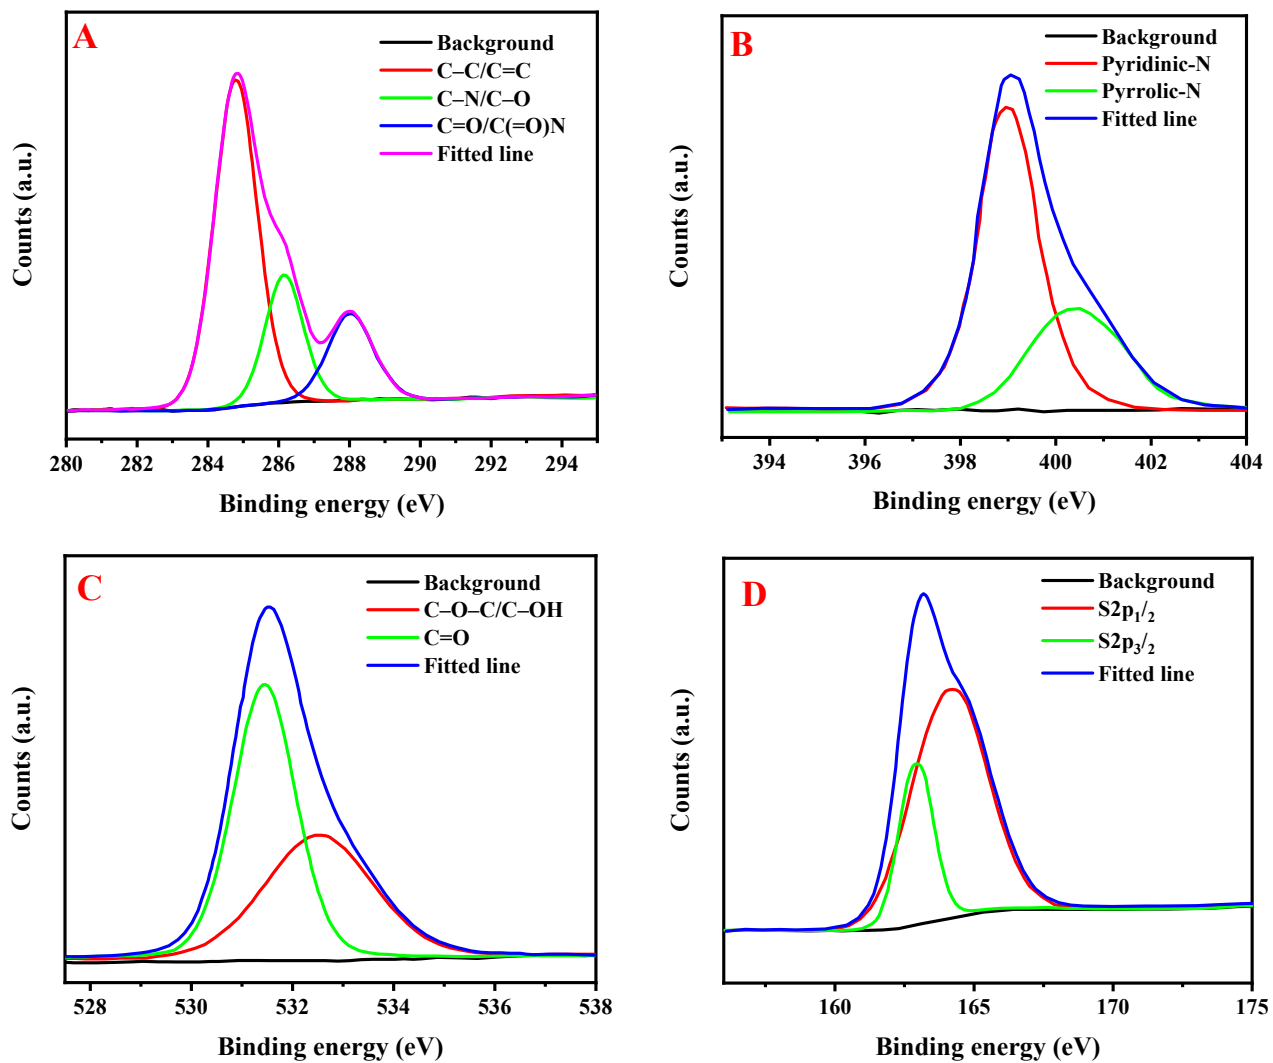

**Fig. S1.** Detailed XPS spectra of (A) C1s, (B) N1s, (C) O1s and (D) S2p of N, S-CDs.

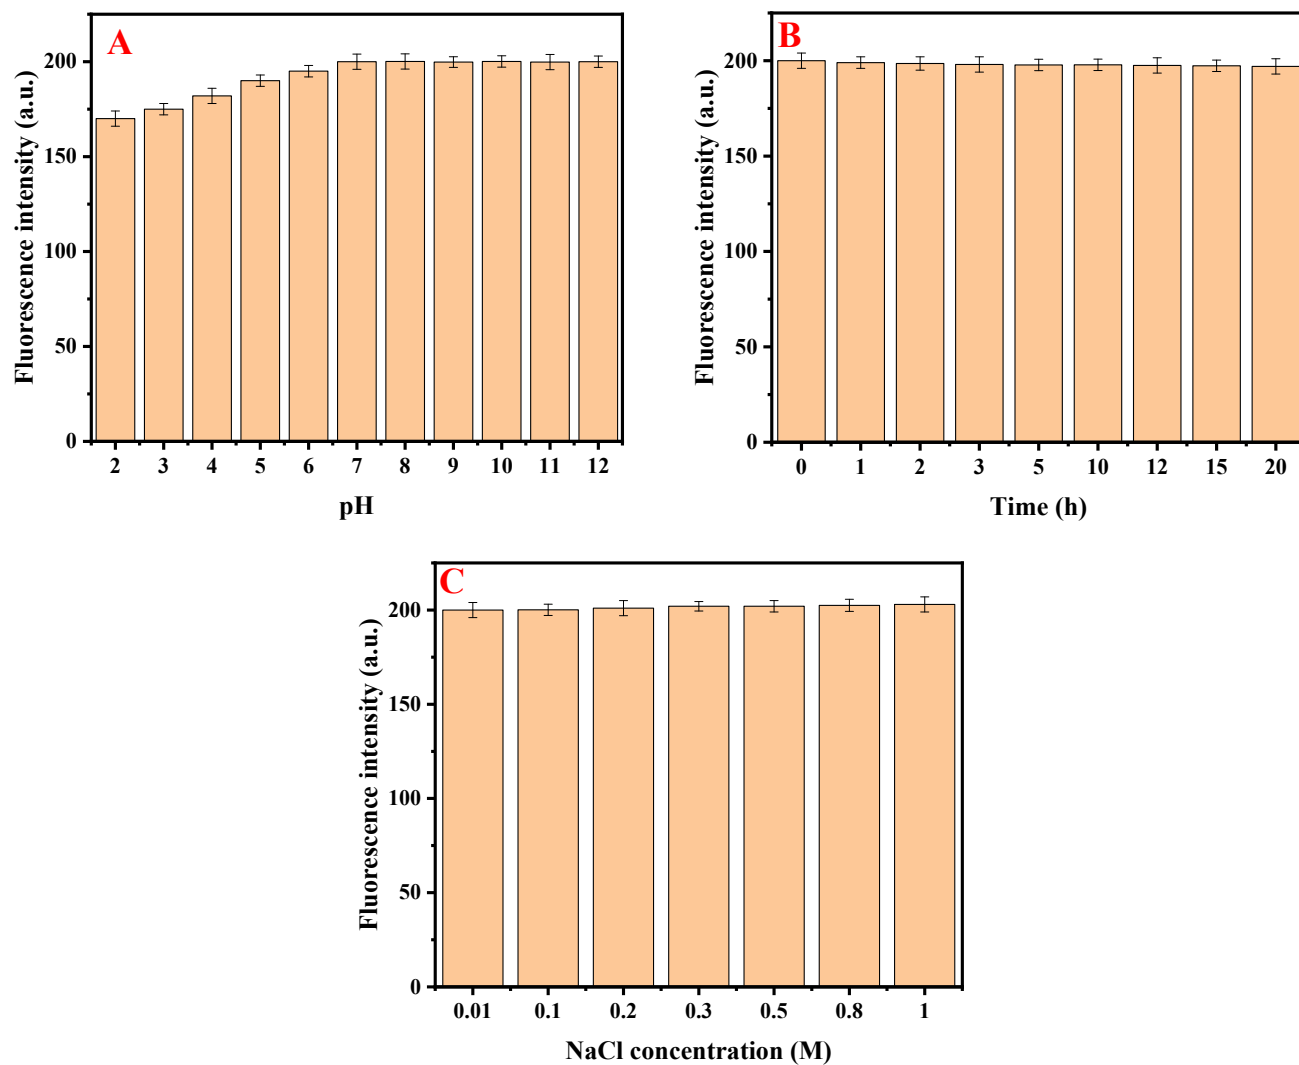

**Fig. S2.** Stability of the fluorescence response of the prepared N, S-CDs under various conditions: (A) effect of pH (2 – 12), (B) effect of UV irradiation time (0 –20 h) (C) effect of NaCl concentration (0.01 – 1.0 M) and. All measurements were performed in triplicates.

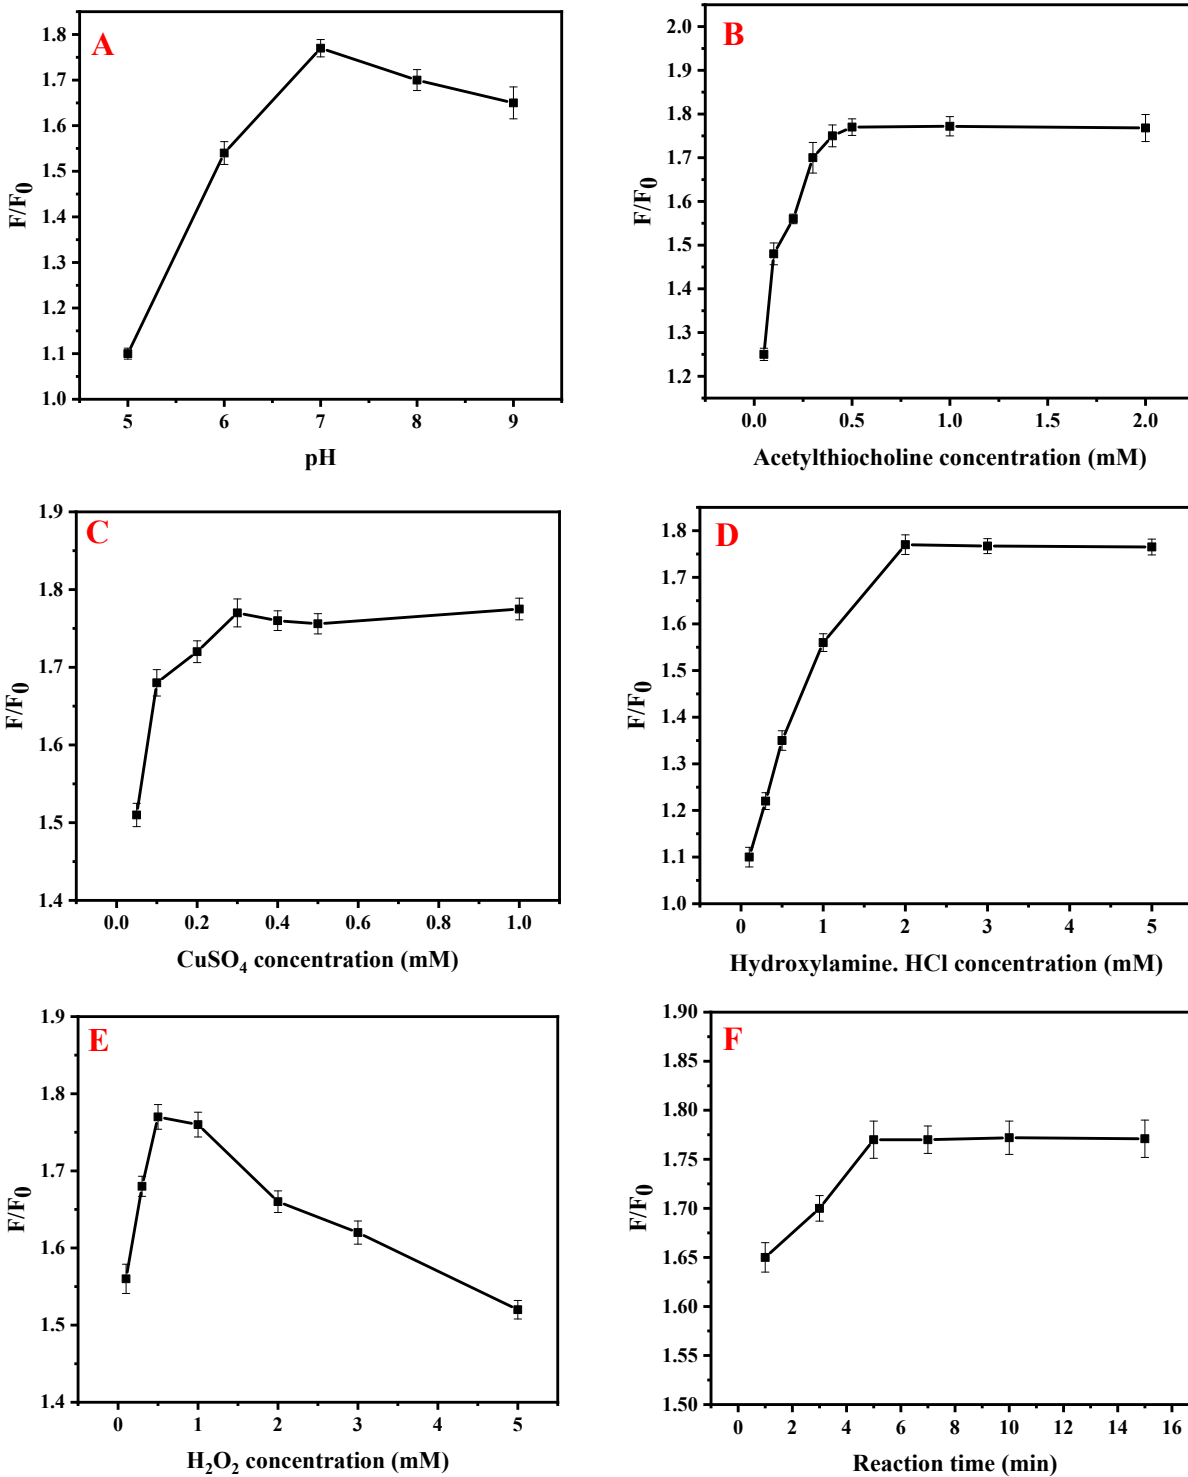

**Fig. S3.** Effect of (A) pH (5.0–9.0), (B) acetylthiocholine concentration (0.05–2.0 mM), (C)  $\text{CuSO}_4$  concentration (0.05 to 1.0 mM), (D) hydroxylamine. HCl concentration (0.1–5.0 mM), (E)  $\text{H}_2\text{O}_2$  concentration (0.1–5.0 mM), and (F) incubation time (1–15 min.) on  $F/F_0$  of  $\text{Cu(I)/H}_2\text{O}_2/\text{N}$ , S-CDs.

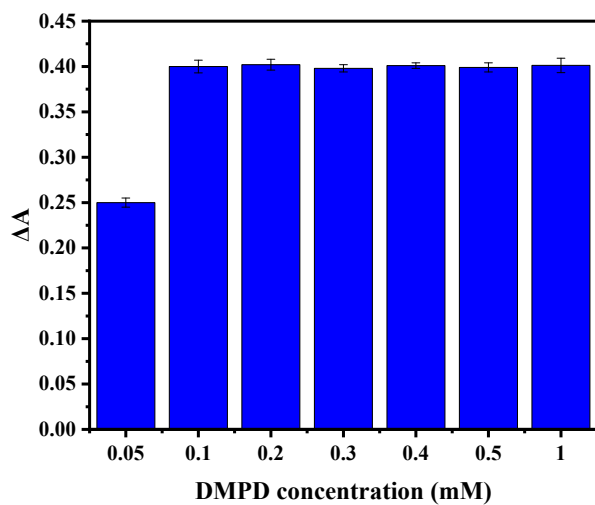

**Fig. S4.** Effect of DMPD concentration (0.05 and 1.0 mM) on the absorbance of Cu(I)/H<sub>2</sub>O<sub>2</sub>/DMPD

**Table S1.** Comparison of the proposed method for AChE detection with previously reported methods.

| <b>Method</b>       | <b>Sensor</b>                                         | <b>Linearity range<br/>(mU/mL)</b> | <b>LOD<br/>(mU/mL)</b> | <b>Ref.</b>      |
|---------------------|-------------------------------------------------------|------------------------------------|------------------------|------------------|
| <b>Colorimetric</b> | Au@PDA NPs hydrogel                                   | 2.5–25                             | 0.9                    | 1                |
|                     | Fe-N-C SAzymes                                        | 0.5–25                             | 0.014                  | 2                |
|                     | FeMn DSAs/N-CNTs                                      | 0.1–30                             | 0.066                  | 3                |
|                     | Cu-Fe-ZIF-8/P-GCNN-H <sub>2</sub> O <sub>2</sub> -TMB | 0.004–0.02                         | 0.00013                | 4                |
|                     | Phosphorus quantum dots                               | 0.5–10                             | 0.17                   | 5                |
|                     | Cu(I)/H <sub>2</sub> O <sub>2</sub> /DMPD             | 0.1–10.0                           | 0.028                  | <b>This work</b> |
| <b>Fluorometric</b> | Ag-AuNCs@SiNPs nanohybrids                            | 0.03–4.0                           | 0.0021                 | 6                |
|                     | Cysteine-sensing system                               | 0.05–1.3                           | 0.05                   | 7                |
|                     | gold nanoclusters-Cu <sup>2+</sup>                    | 0.05–25                            | 0.05                   | 8                |
|                     | AuAgNCs                                               | 0.4–25                             | 0.15                   | 9                |
|                     | ATCI-H <sub>2</sub> O <sub>2</sub> -OPD               | 0.01–8                             | 0.006                  | 10               |
|                     | GSH-Au NCs@ZIF-8                                      | 0-5                                | 0.017                  | 11               |
|                     | Cu(I)/H <sub>2</sub> O <sub>2</sub> /N, S-CDs         | 0.02–0.6                           | 0.0068                 | <b>This work</b> |

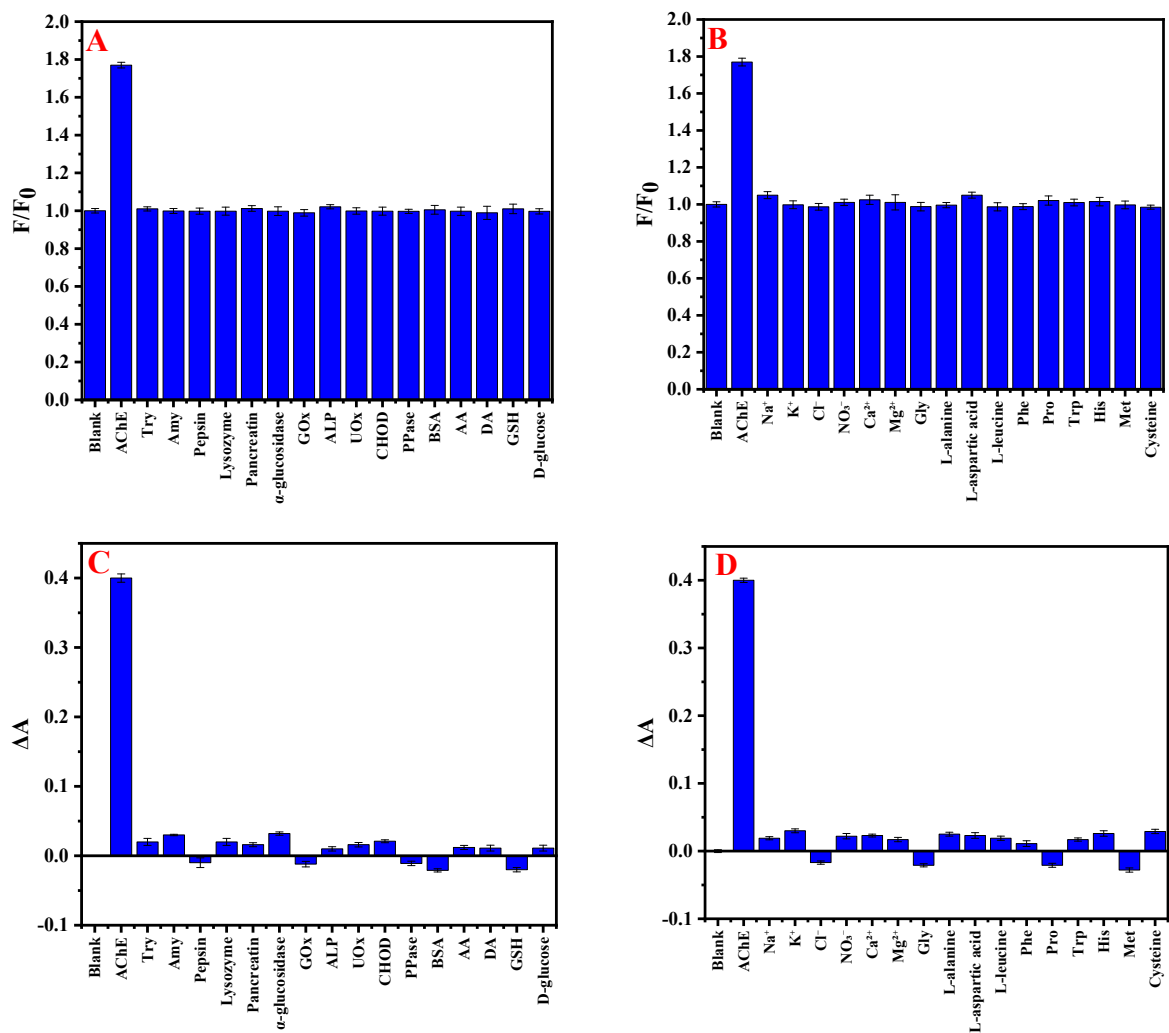

**Fig. S5.** Effect of AChE and different interferants on (A) F/F<sub>0</sub> of Cu(I)/H<sub>2</sub>O<sub>2</sub>/N, S-CDs and (B) ΔA of Cu(I)/H<sub>2</sub>O<sub>2</sub>/DMPD system.

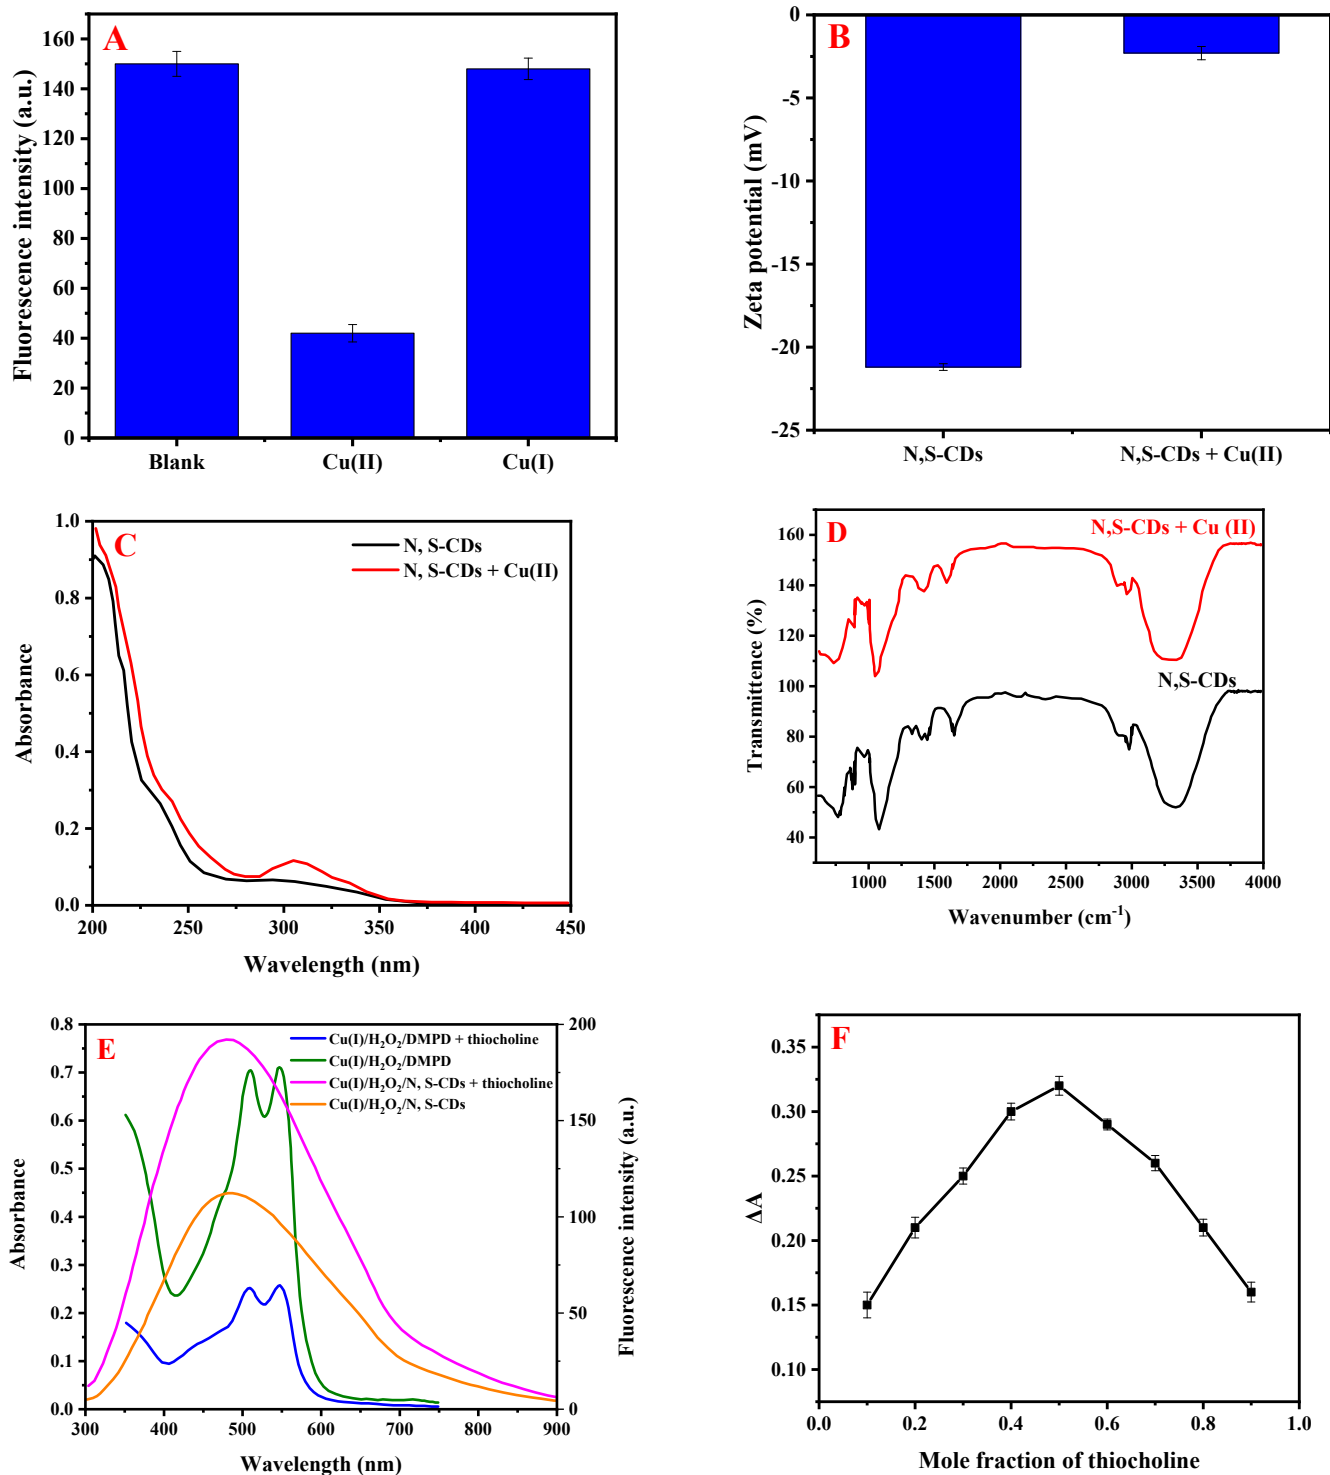

**Fig. S6.** (A) Fluorescence emission of H<sub>2</sub>O<sub>2</sub>/N, S-CDs in presence of Cu(II) and Cu(I), (B) zeta potential of N, S-CDs before and after addition of Cu(II), (C) absorption spectrum of N, S-CDs before and after addition of Cu(II), (D) FTIR spectrum of N, S-CDs before and after addition of Cu(II), (E) emission spectrum of Cu(I)/H<sub>2</sub>O<sub>2</sub>/N, S-CDs and absorption spectrum of Cu(I)/H<sub>2</sub>O<sub>2</sub>/DMPD before and after addition of thiocholine, and (F) Job's plot for thiocholine-Cu(I) interaction.

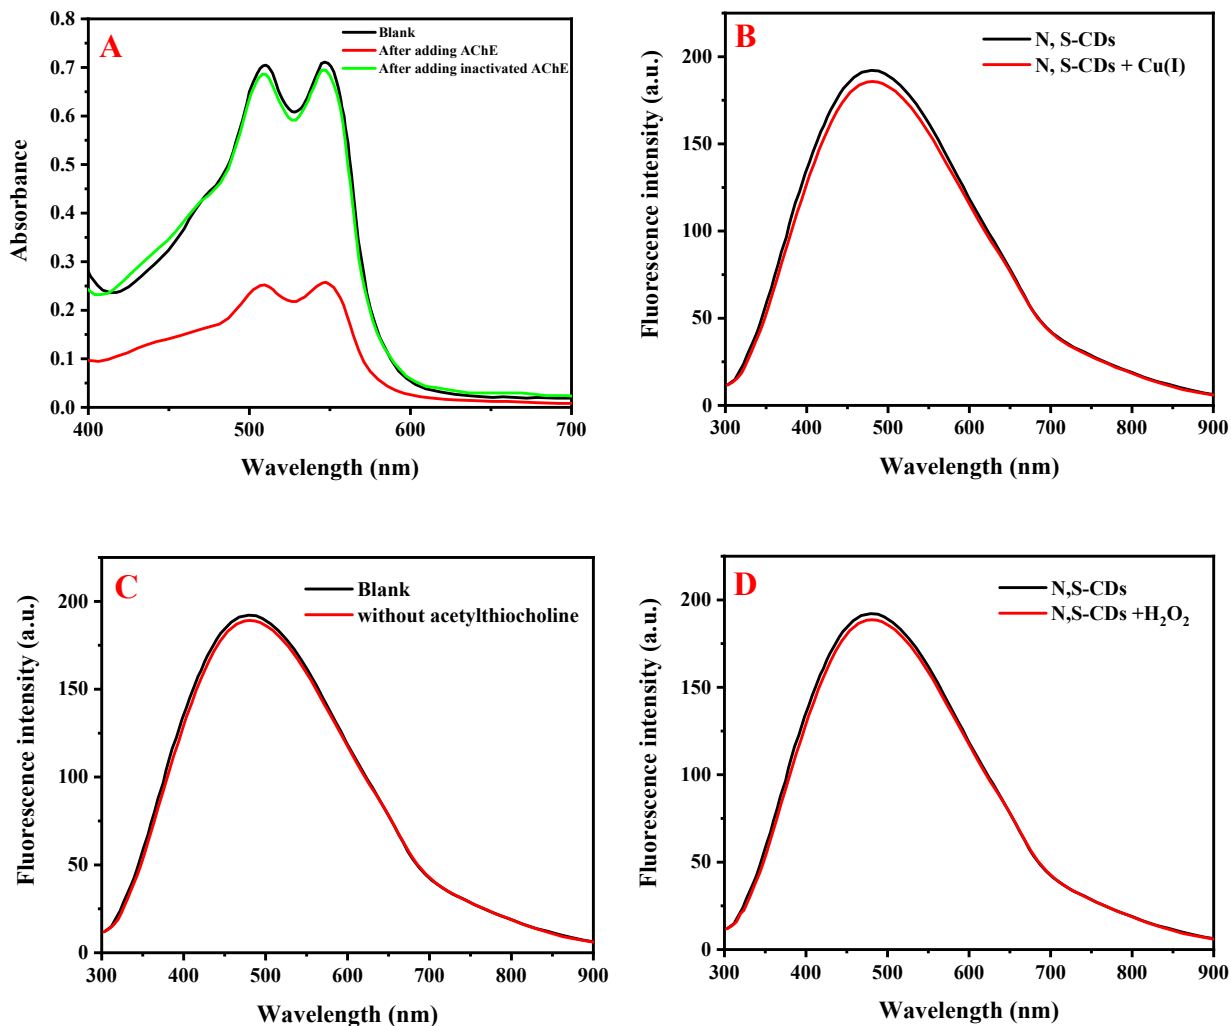

**Fig. S7.** (A) absorption spectrum of Cu(I)/H<sub>2</sub>O<sub>2</sub>/DMPD after addition of AChE and inactivated AChE, (B) Fluorescence emission of N, S-CDs in presence of Cu(I), (C) Fluorescence emission of Cu(I)/H<sub>2</sub>O<sub>2</sub>/N, S-CDs in absence of acetylthiocholine, and (D) Fluorescence emission of N, S-CDs before and after addition of H<sub>2</sub>O<sub>2</sub>.

## References

1. J. Zhang, L. Mou and X. Jiang, *Analytical Chemistry*, 2018, **90**, 11423-11430.
2. Y. Wu, L. Jiao, X. Luo, W. Xu, X. Wei, H. Wang, H. Yan, W. Gu, B. Z. Xu, D. Du, Y. Lin and C. Zhu, *Small*, 2019, **15**, 1903108.
3. Y.-W. Mao, J. Zhang, R. Zhang, J.-Q. Li, A.-J. Wang, X.-C. Zhou and J.-J. Feng, *Analytical Chemistry*, 2023, **95**, 8640-8648.
4. M. Zheng, M. Liu, F. Ma, Z. Song, H. Zhu, H. Guo and H. Sun, *Chemical Engineering Journal*, 2025, **505**, 159482.
5. L. Ren, H. Li, M. Liu and J. Du, *Analyst*, 2020, **145**, 8022-8029.
6. M. Wang, N. Li, S. Wang, J. Chen, M. Wang, L. Liu and X. Su, *Sensors and Actuators B: Chemical*, 2021, **345**, 130430.
7. B. Zhang and C. Wei, *ChemistrySelect*, 2017, **2**, 6844-6849.
8. J. Sun and X. Yang, *Biosensors and Bioelectronics*, 2015, **74**, 177-182.
9. R. Liu, Z. Wu, Y. Yang, S. Liao and R. Yu, *Materials Research Express*, 2018, **5**, 065027.
10. X. Huang, Y. Cheng, Q. Zhou, Y. Tu and J. Yan, *Spectrochimica Acta Part A: Molecular and Biomolecular Spectroscopy*, 2024, **313**, 124116.
11. D. Wei, M. Li, Y. Wang, N. Zhu, X. Hu, B. Zhao, Z. Zhang and D. Yin, *Journal of Hazardous Materials*, 2023, **441**, 129890.
